# Supplementary material
Source: PubMed Central journal article supplement (PMC6733032)
Supplement: NIHMS1532888-supplement-2.pdf [file NIHMS1532888-supplement-2.pdf]

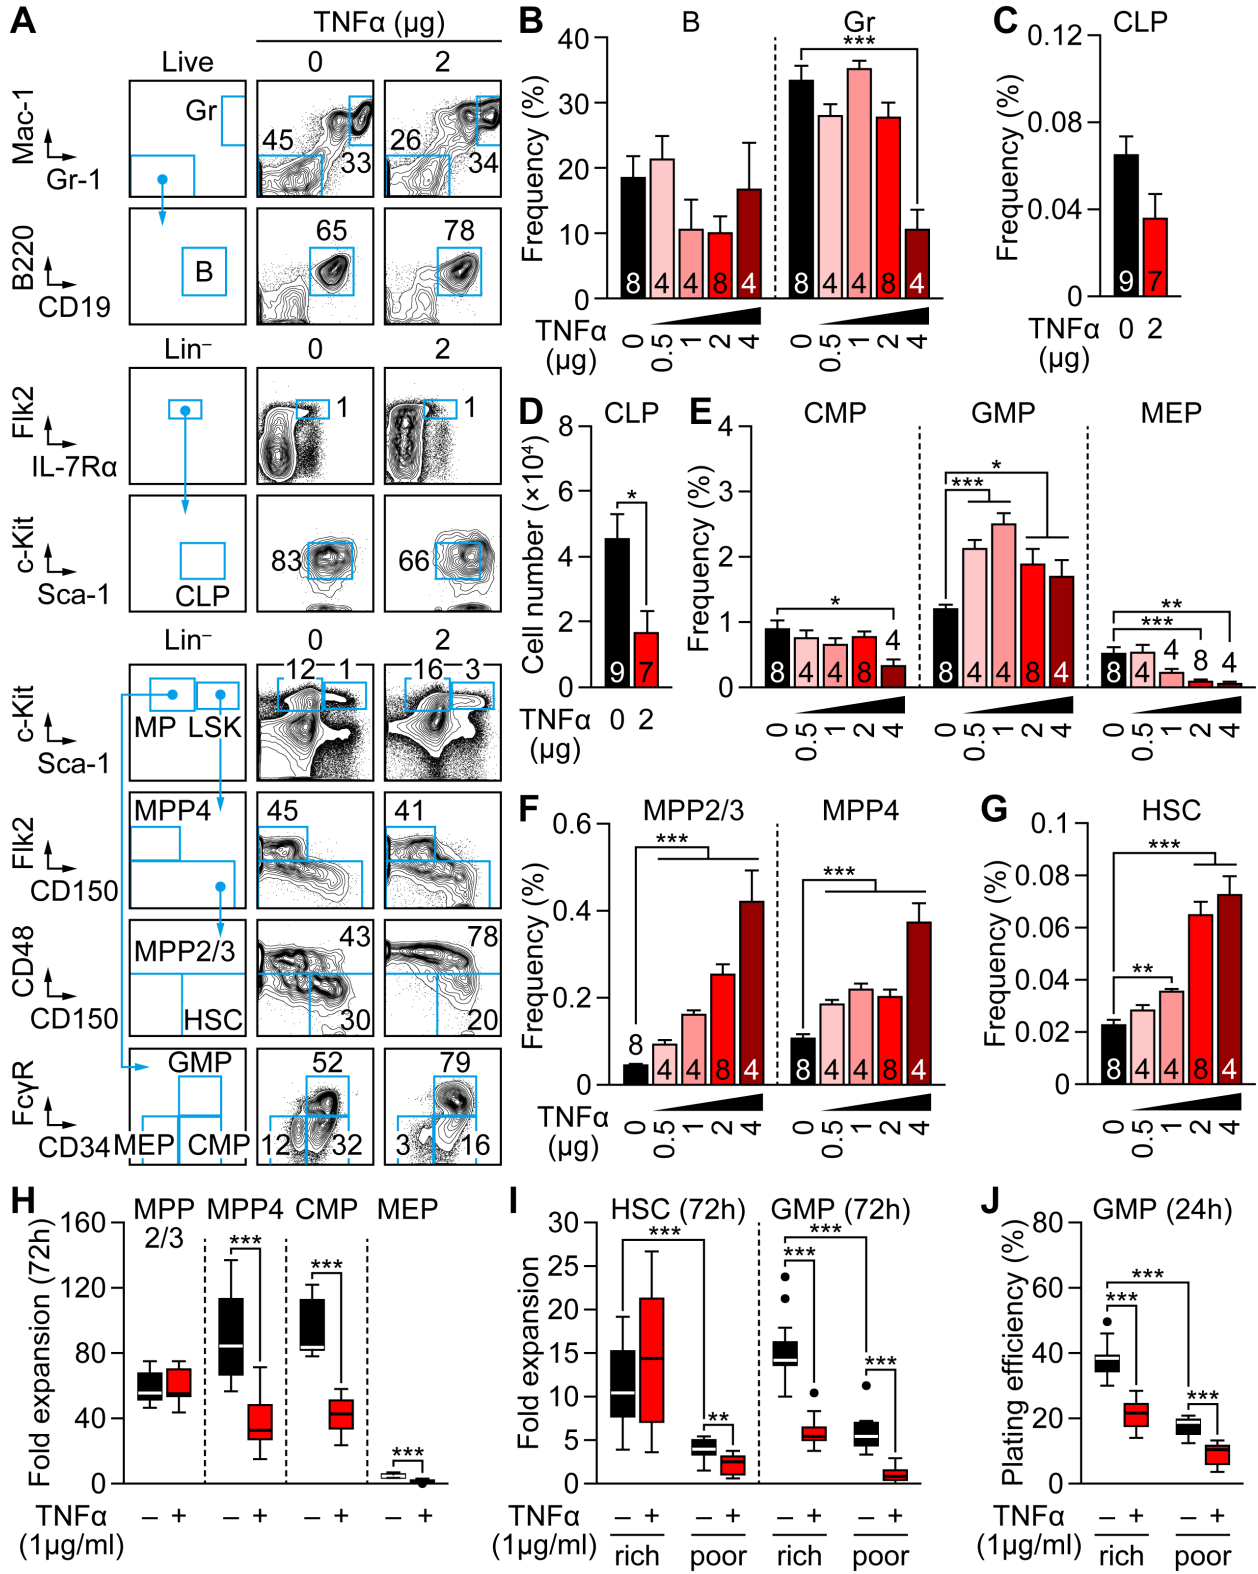

**Figure S1. Differential effects of TNF $\alpha$  on HSCs and their progeny, related to Figure 1**

(A) Gating strategy used to identify BM Grs and B cells (top), lymphoid progenitors (CLP) (middle), myeloid progenitors (CMP, GMP, MEP) and early stem and progenitor population (HSC, MPP2/3, MPP4) (bottom) in WT mice  $\pm$  TNF $\alpha$  injections.

(B) Frequencies of BM B cells and Grs  $\pm$  TNF $\alpha$  (n = 4-8 mice/group from 5 independent experiments).

(C-D) Lymphoid progenitors: (C) frequency and (D) absolute numbers of BM CLPs  $\pm$  TNF $\alpha$  (n = 7-9 mice/group from 9 independent experiments).

(E-G) Frequencies BM stem and progenitors  $\pm$  TNF $\alpha$  (n = 4-8 mice/group from 5 independent experiments): (E) myeloid progenitors, (F) MPPs, and (G) HSCs.

(H) Expansion of the indicated BM populations after 72h culture  $\pm$  TNF $\alpha$  (n = 9-12 pools of 350-500 cells/group from 3-4 independent experiments). Results are expressed as fold expansion compared to the number of plated cells/condition.

(I) Expansion of BM HSCs and GMPs after 72h culture in cytokine-rich (IL-3, SCF, TPO, EPO, GM-CSF, IL-11 and Flt3-L) or -poor (SCF and G-CSF) media  $\pm$  TNF $\alpha$  (n = 12 pools of 300-500 cells/group from 4 independent experiments). Results are expressed as fold expansion compared to the number of plated cells/condition.

(J) Plating efficiency in  $-$ TNF $\alpha$  methylcellulose of BM GMPs after 24h culture in cytokine-rich or -poor media  $\pm$  TNF $\alpha$  (n = 9 pools of 100 cells/group from 3 independent experiments). Colonies are scored after 7 days.

Data are mean  $\pm$  SEM, \* $P$  < 0.05, \*\* $P$  < 0.01, \*\*\* $P$  < 0.001.

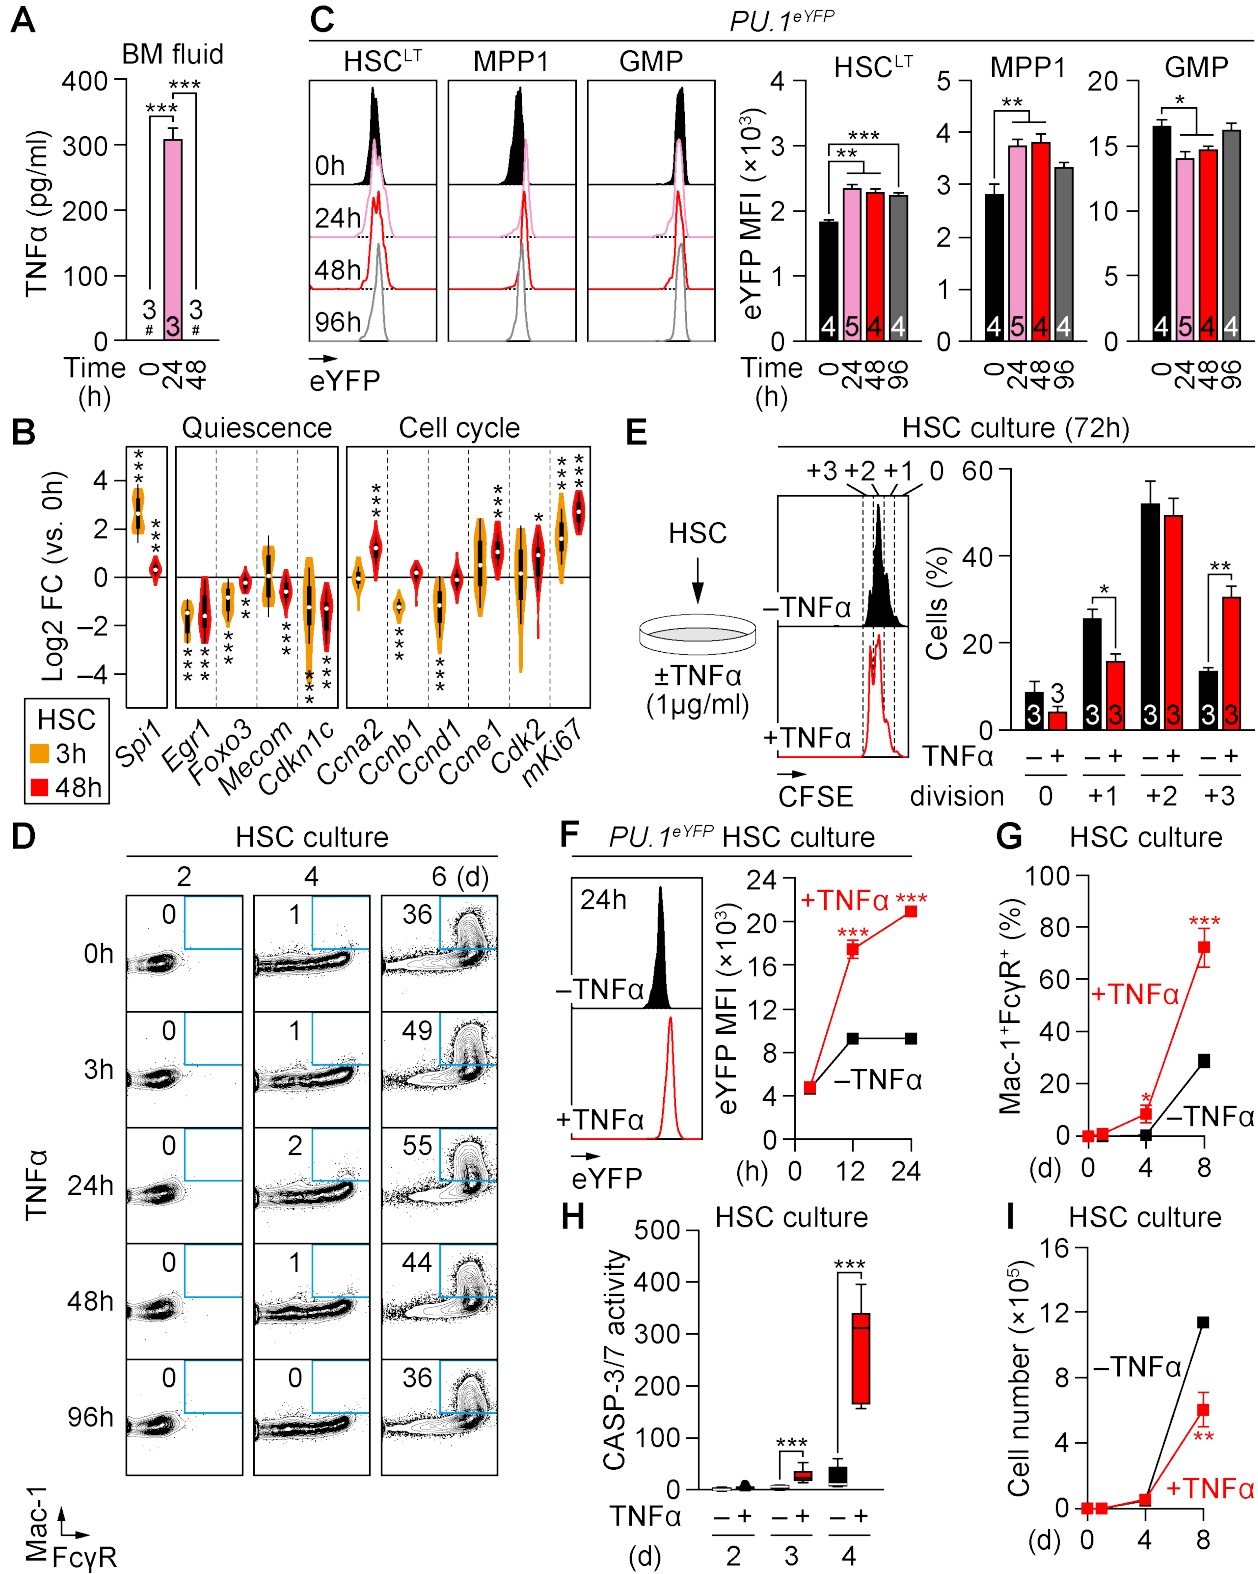

**Figure S2. Cell cycle activation and myeloid priming in TNF $\alpha$ -exposed HSCs, related to Figure 2**

(A) ELISA measurement of TNF $\alpha$  concentration in BM fluid of WT mice  $\pm$  TNF $\alpha$  (n = 3 biological replicates/group from 3 independent experiments); # undetectable or less than 8 pg/ml.

(B) Fluidigm qRT-PCR analyses of *Spi1* (PU.1), quiescence- and cell cycle-associated gene expression in BM HSCs  $\pm$  TNF $\alpha$  (n = 22-24 pools of 100 cells/group from 4 mice in 2 independent experiments). Results are expressed as log<sub>2</sub> fold changes compared to 0h HSCs (\* vs. 0h).

(C) PU.1 level in the indicated BM *PU.1-eYFP* populations  $\pm$  TNF $\alpha$  (n = 4-5 mice/group from 2 independent experiments).

(D) Representative flow cytometry plots showing *in vitro* myeloid differentiation from BM HSCs  $\pm$  TNF $\alpha$ .

(E) Experimental design and divisional history of CFSE-labelled BM HSC after 72h culture  $\pm$  TNF $\alpha$  (n = 3 pools of 1000 cells/group from 3 independent experiments).

(F) PU.1 level in BM *PU.1-eYFP* HSCs after 24h culture  $\pm$  TNF $\alpha$  (n = 3 pools of 1000 cells/group from 3 independent experiments).

(G) *In vitro* myeloid differentiation of BM HSCs cultured  $\pm$  TNF $\alpha$  (n = 5 pools of 1000 cells/group from 5 independent experiments). Results are shown as percentage of Mac-1<sup>+</sup>/Fc $\gamma$ R<sup>+</sup> mature myeloid cells.

(H) CASP-3/7 activity in BM HSCs cultured  $\pm$  TNF $\alpha$  (n = 9-12 pools of 200 cells/group from 3-4 independent experiments). Results are expressed as fold changes compared to -TNF $\alpha$  HSCs on day 2 (set to 1).

(I) Expansion of BM HSCs cultured  $\pm$  TNF $\alpha$  (n = 3 pools of 1000 cells/group from 3 independent experiments). Results are expressed as absolute numbers.

Data are mean  $\pm$  SEM, \* $P$  < 0.05, \*\* $P$  < 0.01, \*\*\* $P$  < 0.001.

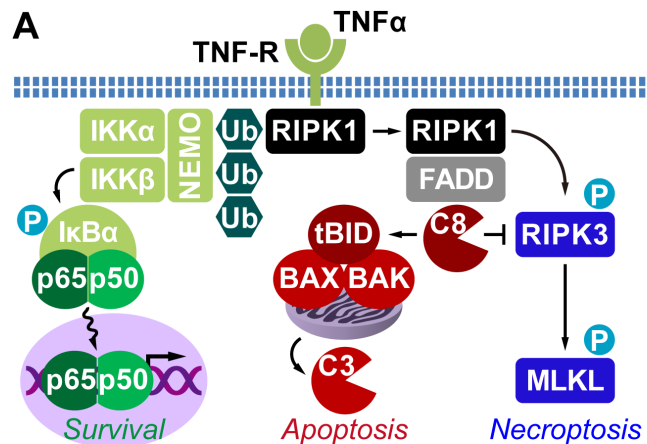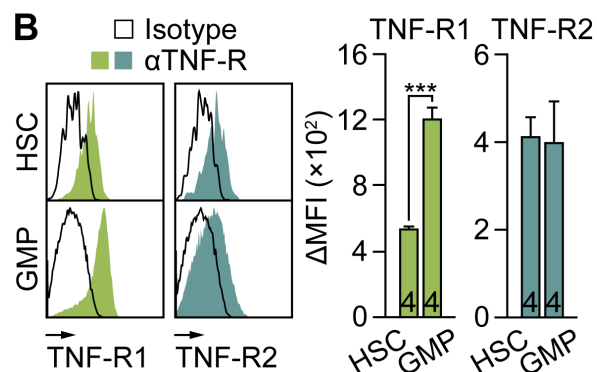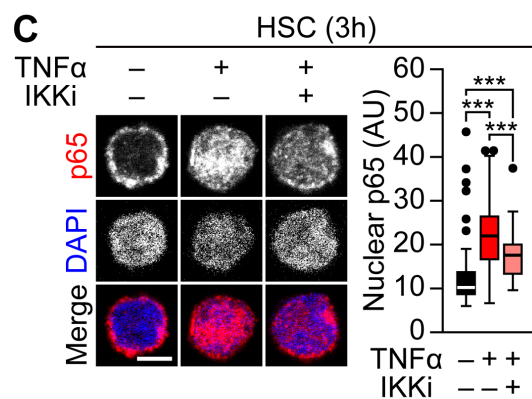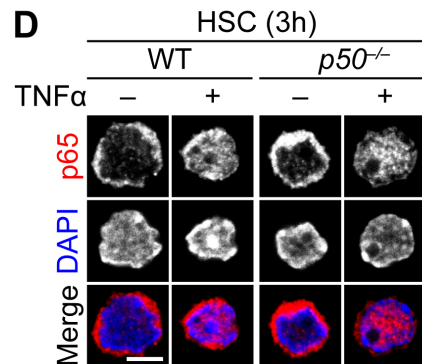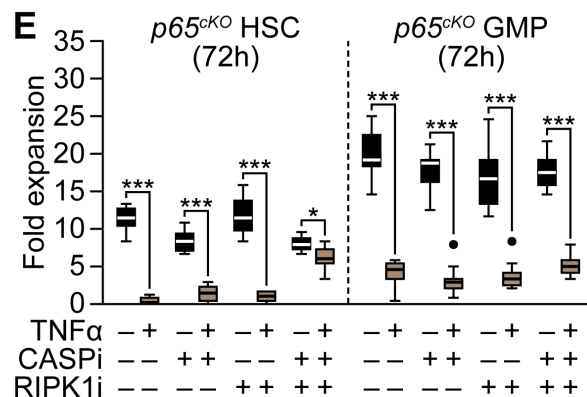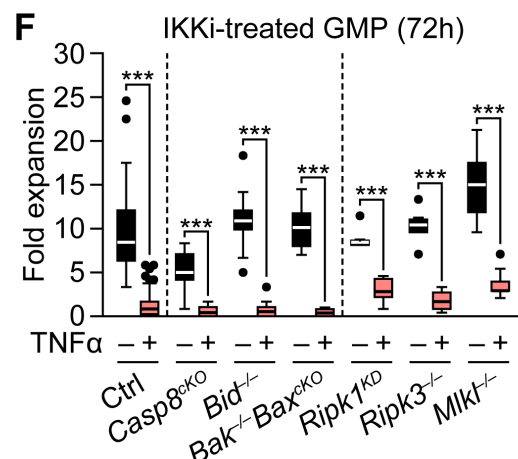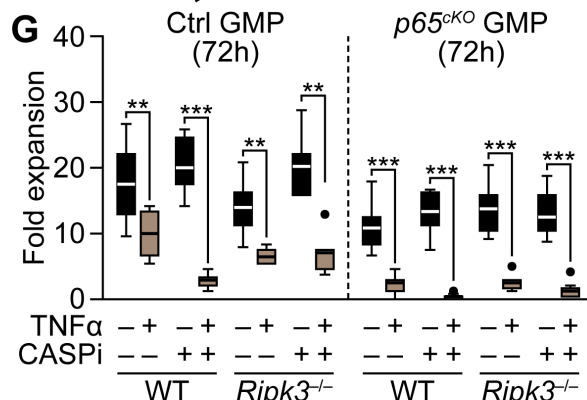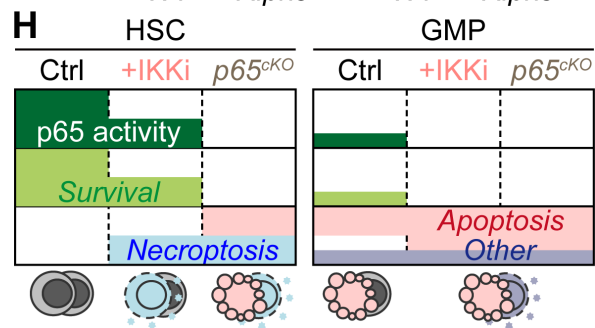

**Figure S3. Differential activation of NF- $\kappa$ B and programmed cell death pathways in HSCs and GMPs, related to Figure 3**

(A) Schematic of signaling pathways regulated by TNF $\alpha$ ; C8, caspase-8; tBID, truncated BID; C3, caspase-3. Ub, ubiquitin; P, phosphate.

(B) TNF $\alpha$  receptor-1 (TNF-R1) and -2 (TNF-R2) expression in BM HSCs and GMPs. Results are expressed as  $\Delta$ MFI obtained by subtracting MFI values of isotype control from MFI values of TNF-R1 or -R2 antibody ( $\alpha$ TNF-R, n = 4 mice per group from 2 independent experiments).

(C) p65 nuclear localization in BM HSCs after 3h culture  $\pm$  TNF $\alpha$  and IKKi; scale bar, 5  $\mu$ m. Results are expressed as arbitrary units (AU) corresponding to total fluorescence of p65 in the nucleus (n = 50-51 cells per group from 1 experiment).

(D) p65 localization in BM WT and *p50*<sup>-/-</sup> HSCs after 3h culture  $\pm$  TNF $\alpha$ ; scale bar, 5  $\mu$ m.

(E) Expansion of BM *p65*<sup>ckO</sup> HSCs and GMPs after 72h culture  $\pm$  TNF $\alpha$ , pan-caspase inhibitor (CASPi, 20  $\mu$ M zVAD-fmk) and RIPK1 kinase inhibitor (RIPK1i, 10  $\mu$ M GSK'963) (n = 8-9 pools of 300 cells/group from 3 independent experiments). Results are expressed as fold expansion compared to the number of plated cells/condition.

(F) Expansion of the indicated IKKi-treated BM GMPs after 72h culture  $\pm$  TNF $\alpha$  (n = 9-63 pools of 300-500 cells/group from 21 independent experiments). Results are expressed as fold expansion compared to the number of plated cells/condition.

(G) Expansion of the indicated BM GMPs after 72h culture  $\pm$  TNF $\alpha$  and CASPi (n = 6-9 pools of 300 cells/group from 3 independent experiments). Results are expressed as fold expansion compared to the number of plated cells/condition.

(H) Schematic illustrating relationship between p65/NF- $\kappa$ B activity and programmed cell death in HSCs and GMPs. HSCs survive TNF $\alpha$  challenge when they can fully engage p65-dependent pro-survival pathways. Partial inhibition of NF- $\kappa$ B leads to HSC susceptibility to necroptosis-mediated killing, whereas complete inhibition results in their death by both apoptosis and necroptosis. In contrast, GMPs only weakly activate p65-dependent pro-survival pathways upon TNF $\alpha$  exposure and primarily die from apoptosis, although they can also engage alternative form of cell death distinct from necroptosis when apoptosis is blocked. NF- $\kappa$ B blockade further increases GMP susceptibility to TNF $\alpha$  cytotoxicity.

Data are mean  $\pm$  SEM, \**P* < 0.05, \*\**P* < 0.01, \*\*\**P* < 0.001.

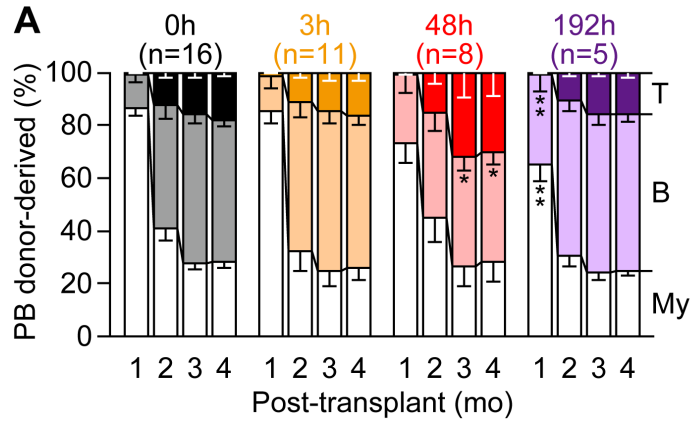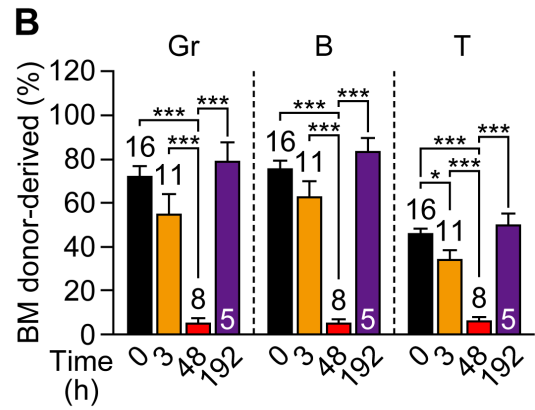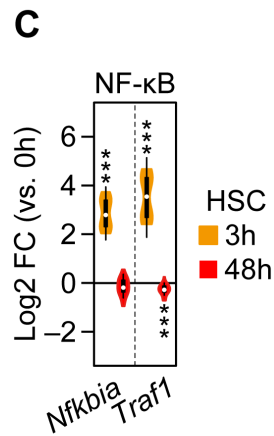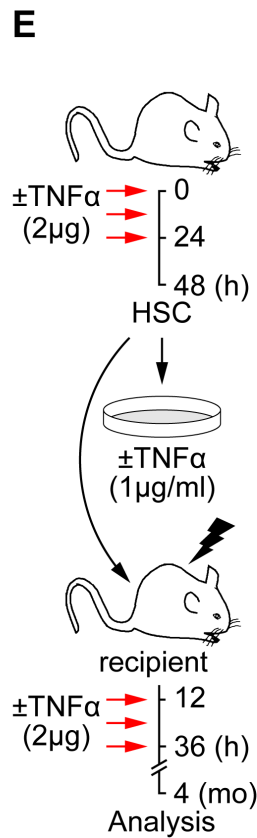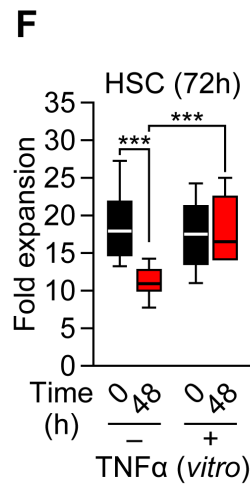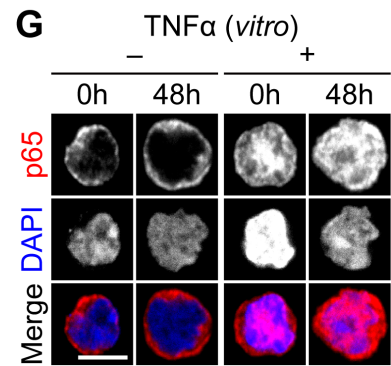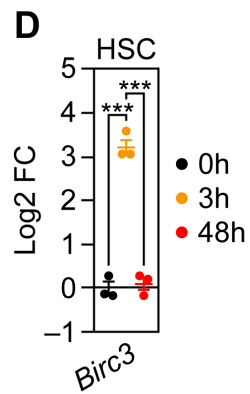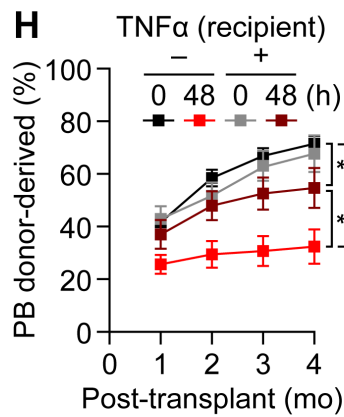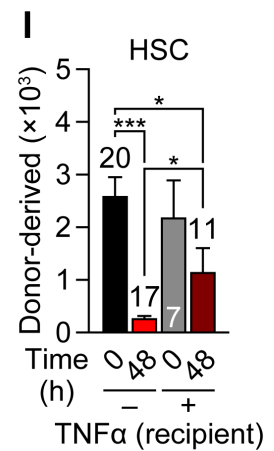

**Figure S4. Engraftment potential of TNF $\alpha$ -treated HSCs, related to Figure 5**

(A-B) Analyses of recipient mice transplanted with BM HSCs  $\pm$  TNF $\alpha$  (n = 5-16 mice/group from 3 independent experiments; experimental scheme shown in Fig. 5A): donor-derived lineage distribution in (A) PB (\* vs. WT) and (B) BM 4 months post-transplantation; My, myeloid.

(C) Fluidigm qRT-PCR analyses of NF- $\kappa$ B target gene expression in BM HSCs  $\pm$  TNF $\alpha$  (n = 22-24 pools of 100 cells/group from 4 mice in 2 independent experiments). Results are expressed as log<sub>2</sub> fold changes compared to 0h HSCs (\* vs. 0h).

(D) Quantitative RT-PCR analyses of *Birc3* expression in BM HSCs  $\pm$  TNF $\alpha$  (n = 3 biological replicates/group from 3 independent experiments). Results are expressed as log<sub>2</sub> fold changes compared to 0h HSCs.

(E-I) *In vitro* and *in vivo* TNF $\alpha$  supplementation of 0h and 48h TNF $\alpha$ -treated BM HSCs: (E) experimental design; (F) expansion after 72h culture  $\pm$  TNF $\alpha$  supplementation (n = 8-9 pools of 300 cells/group from 3 independent experiments; results are expressed as fold expansion compared to the number of plated cells/condition); (G) representative images of p65 localization after 3h culture  $\pm$  TNF $\alpha$  supplementation (scale bar, 5  $\mu$ m); and (H) donor-derived chimerism in PB and (I) absolute numbers of donor-derived BM HSCs at 4 months post-transplantation in recipient  $\pm$  TNF $\alpha$  supplementation (n = 7-20 mice/group from 5 independent experiments).

Data are mean  $\pm$  SEM, \* $P$  < 0.05, \*\* $P$  < 0.01, \*\*\* $P$  < 0.001.



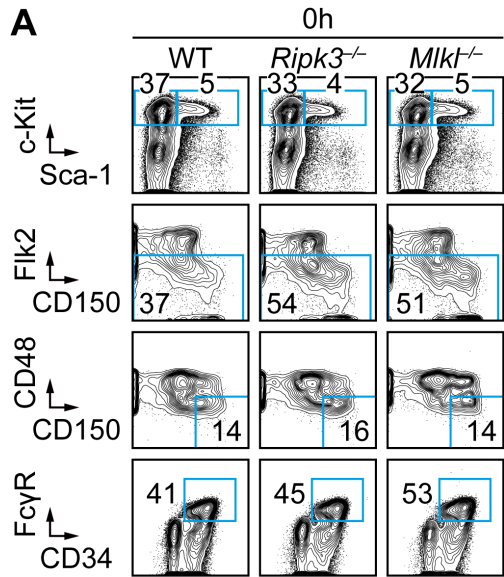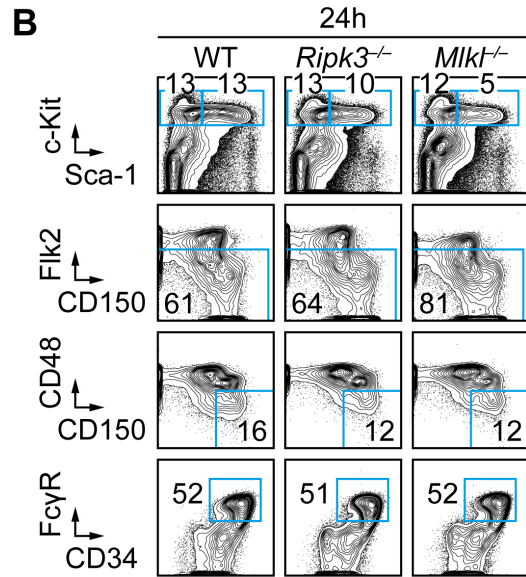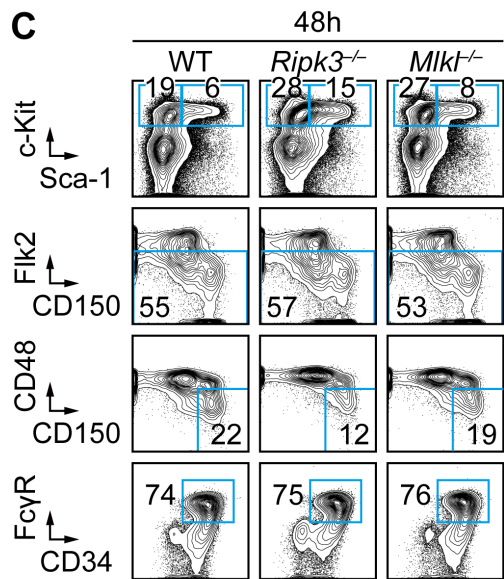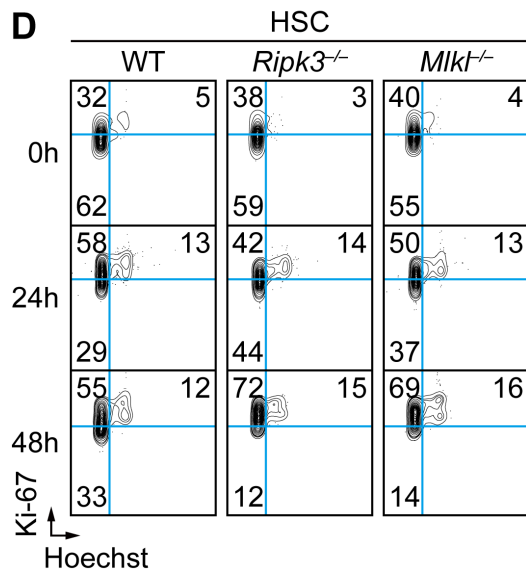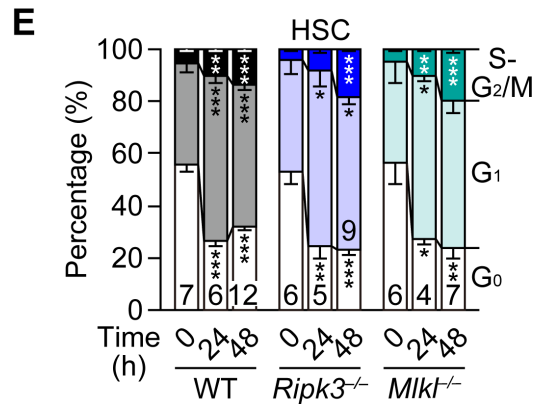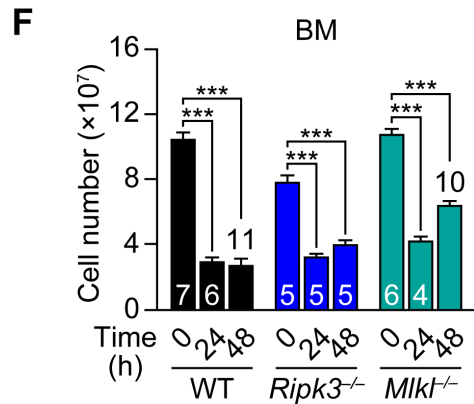

**Figure S5. Analyses of necroptosis-deficient mice after TNF $\alpha$  injection, related to Figure 5**

(A-C). Representative flow cytometry plots of BM HSCs and GMPs in WT, *Ripk3*<sup>-/-</sup> and *Mkl1*<sup>-/-</sup> mice at (A) 0h, (B) 24h and (C) 48h post-TNF $\alpha$  injection.

(D) Representative flow cytometry plots of BM HSCs cell cycle distribution in WT, *Ripk3*<sup>-/-</sup> and *Mkl1*<sup>-/-</sup> mice  $\pm$  TNF $\alpha$ ; G<sub>0</sub>, Ki-67<sup>-</sup>/Hoechst<sup>lo</sup>; G<sub>1</sub>, Ki-67<sup>+</sup>/Hoechst<sup>lo</sup>; S-G<sub>2</sub>/M, Ki-67<sup>+</sup>/Hoechst<sup>hi</sup>.

(E) BM HSCs cell cycle distribution in WT, *Ripk3*<sup>-/-</sup> and *Mkl1*<sup>-/-</sup> mice  $\pm$  TNF $\alpha$  (n = 4-12 mice/group from 6 independent experiments; \* vs. 0h).

(F) BM cellularity in WT, *Ripk3*<sup>-/-</sup> and *Mkl1*<sup>-/-</sup> mice  $\pm$  TNF $\alpha$  (n = 4-11 mice/group from 5 independent experiments).

Data are mean  $\pm$  SEM, \**P* < 0.05, \*\**P* < 0.01, \*\*\**P* < 0.001.

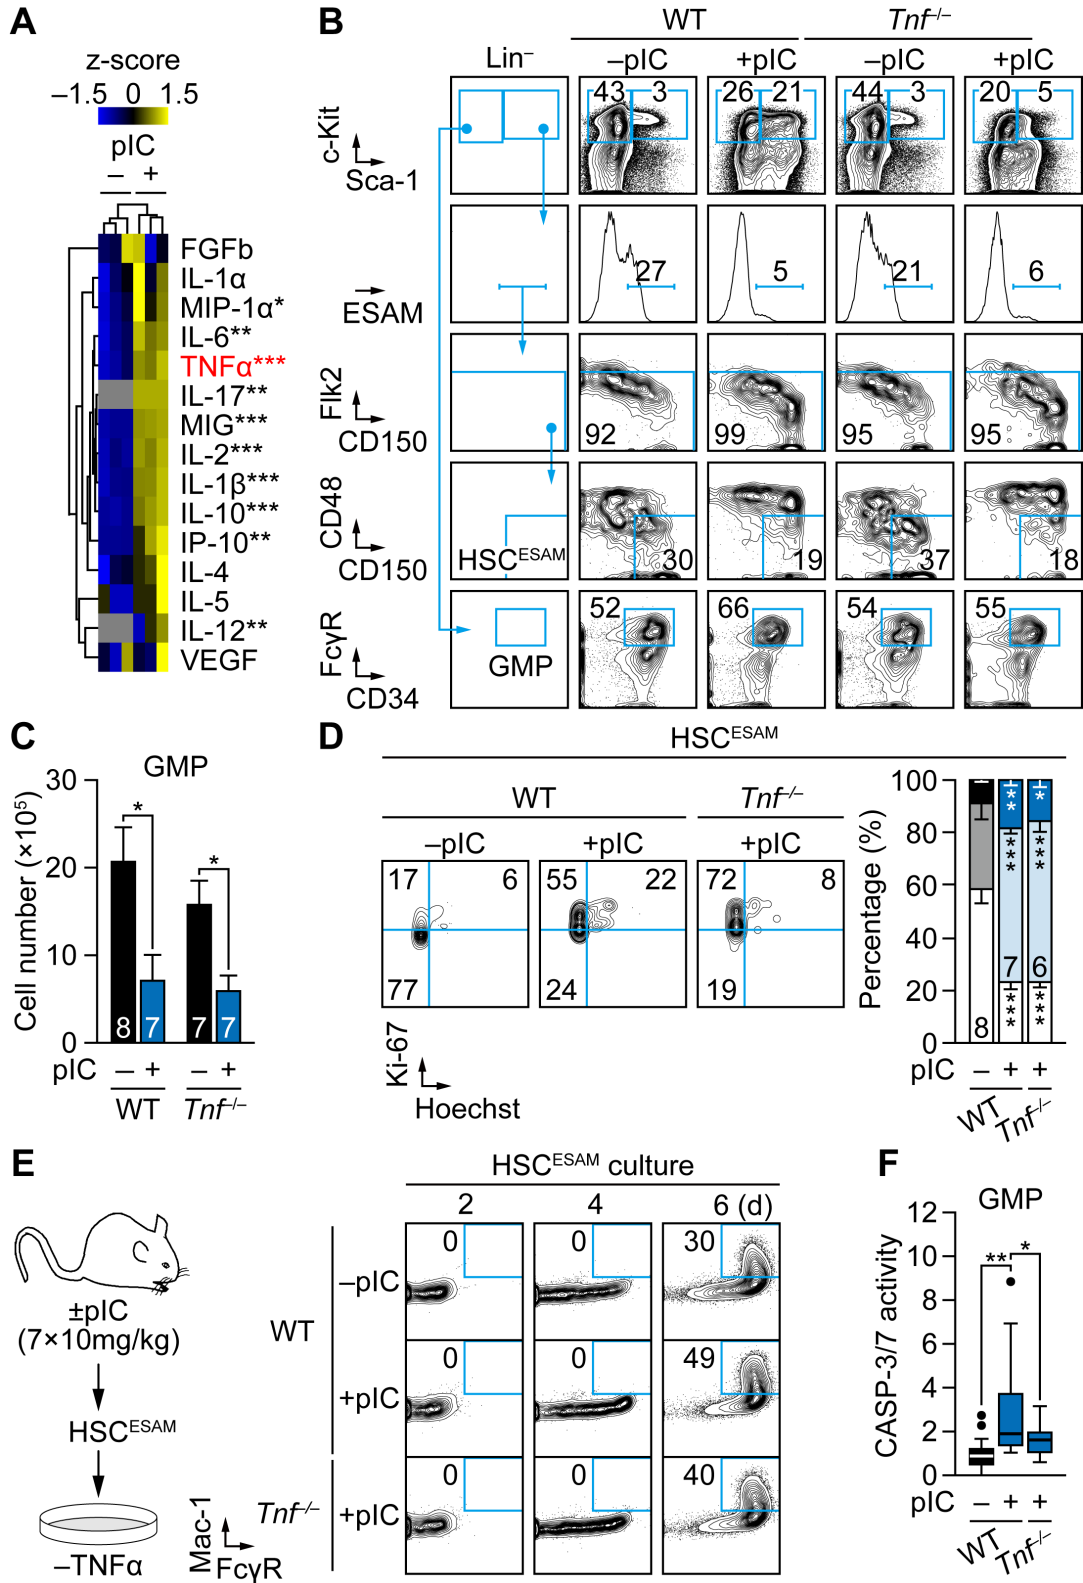

**Figure S6. TNF $\alpha$  drive myelopoiesis from HSCs but induces apoptosis in GMPs during inflammation, related to Figure 6**

(A) Heatmap of cytokine levels in BM fluid of WT mice  $\pm$  pIC (n = 3 biological replicates from 3 mice in 1 experiment). Differentially expressed cytokines are highlighted with asterisks (\* vs. – pIC) and TNF $\alpha$  is shown in red.

(B) Gating strategy used to identify HSC<sup>ESAM</sup> and GMPs in WT and *Tnf*<sup>-/-</sup> mice  $\pm$  pIC.

(C) Absolute number of BM GMPs in WT and *Tnf*<sup>-/-</sup> mice  $\pm$  pIC (n = 7-8 mice/group from 5 independent experiments).

(D) Cell cycle distribution in BM HSC<sup>ESAM</sup> from WT and *Tnf*<sup>-/-</sup> mice  $\pm$  pIC (n = 6-8 mice/group from 4 independent experiments; \* vs. WT –pIC).

(E) Experimental design and *in vitro* myeloid differentiation representative flow cytometry plots of BM HSC<sup>ESAM</sup> from WT and *Tnf*<sup>-/-</sup> mice  $\pm$  pIC.

(F) CASP-3/7 activity in BM GMPs from WT and *Tnf*<sup>-/-</sup> mice  $\pm$  pIC (n = 12-14 pools of 200 cells/group from 3 independent experiments). Results are expressed as fold changes compared to PBS-treated WT GMPs (set to 1).

Data are mean  $\pm$  SEM, \**P* < 0.05, \*\**P* < 0.01, \*\*\**P* < 0.001.

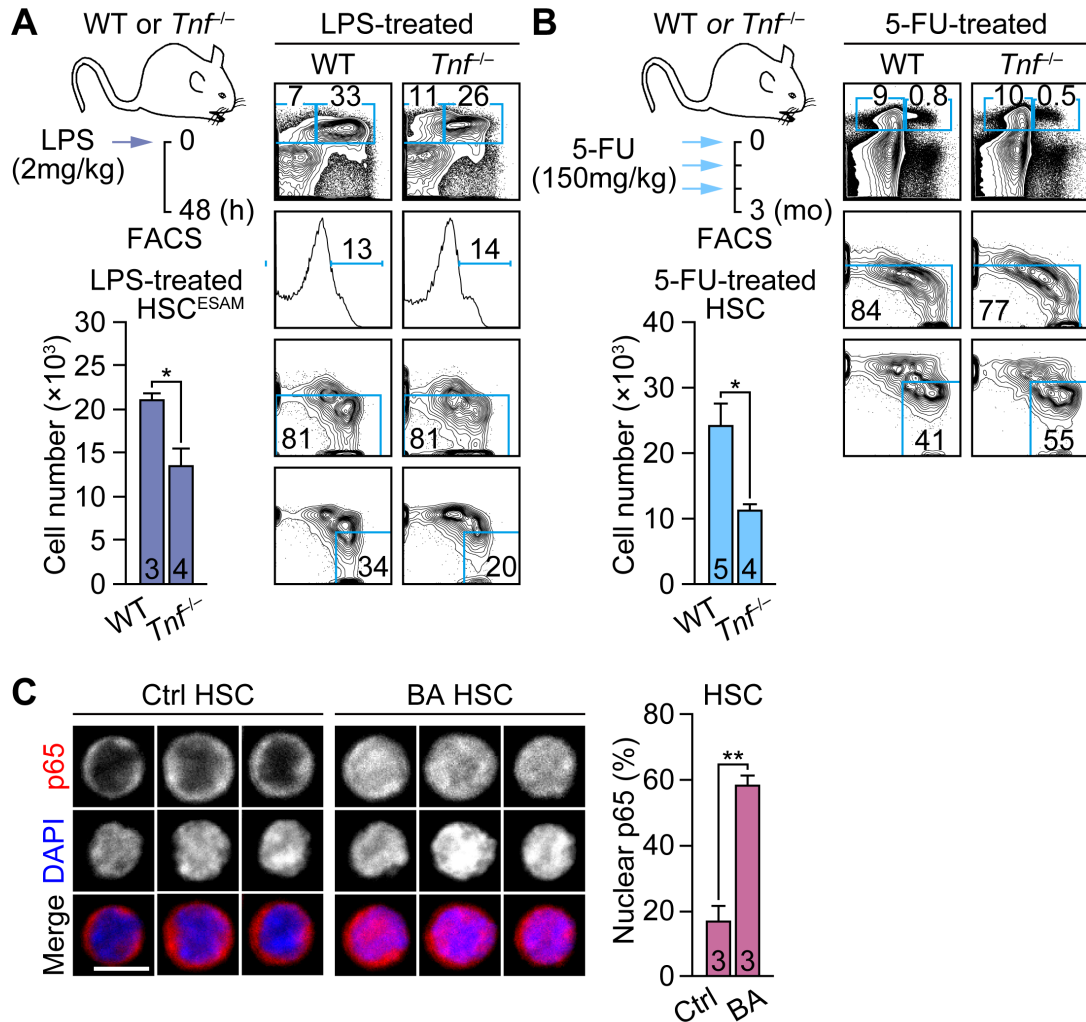

**Figure S7. Protective role for TNF $\alpha$  in HSC maintenance during inflammation and leukemia development, related to Figures 6 and 7**

(A) Experimental design and quantification of BM HSC<sup>ESAM</sup> in LPS-treated WT and *Tnf*<sup>-/-</sup> mice (n = 3-4 mice/group from 1 experiment).

(B) Experimental design and quantification of BM HSCs in 5-FU-treated WT and *Tnf*<sup>-/-</sup> mice (n = 4-5 mice/group from 1 experiment; representative of 3 independent experiments).

(C) p65 localization in BM HSCs from Ctrl and *Scl-tTA:TRE-BCR/ABL* (BA) mice (n = 3 biological replicates/group from 3 independent experiments); scale bar, 5  $\mu$ m.

Data are mean  $\pm$  SEM, \**P* < 0.05, \*\**P* < 0.01, \*\*\**P* < 0.001.

**Table S1. Fluidigm gene expression levels in TNF $\alpha$ -exposed HSCs, related to Figure 2.**

| <i>Genes</i>  | <b>HSC (TNF<math>\alpha</math>)</b> |                    |
|---------------|-------------------------------------|--------------------|
|               | <b>3h</b>                           | <b>48h</b>         |
| <i>Axin2</i>  | 0.72 $\pm$ 0.09*                    | 4.17 $\pm$ 0.49*** |
| <i>Bax</i>    | 1.77 $\pm$ 0.12***                  | 1.56 $\pm$ 0.11*** |
| <i>Bbc3</i>   | 2.63 $\pm$ 0.37***                  | 0.75 $\pm$ 0.13*   |
| <i>Bcl2</i>   | 0.62 $\pm$ 0.04***                  | 1.54 $\pm$ 0.15**  |
| <i>Bcl2l1</i> | 1.00 $\pm$ 0.11                     | 2.04 $\pm$ 0.17*** |
| <i>Birc2</i>  | 2.95 $\pm$ 0.19***                  | 1.14 $\pm$ 0.05*   |
| <i>Bmi</i>    | 1.06 $\pm$ 0.09                     | 1.01 $\pm$ 0.06    |
| <i>Cbx7</i>   | 1.07 $\pm$ 0.05                     | 0.72 $\pm$ 0.04*** |
| <i>Ccl3</i>   | 0.37 $\pm$ 0.03***                  | 0.95 $\pm$ 0.06    |
| <i>Ccna2</i>  | 1.04 $\pm$ 0.06                     | 2.26 $\pm$ 0.18*** |
| <i>Ccnb1</i>  | 0.45 $\pm$ 0.02***                  | 1.09 $\pm$ 0.05    |
| <i>Ccnd1</i>  | 0.49 $\pm$ 0.05***                  | 0.99 $\pm$ 0.07    |
| <i>Ccne1</i>  | 1.83 $\pm$ 0.25*                    | 2.39 $\pm$ 0.23*** |
| <i>Cd34</i>   | 0.99 $\pm$ 0.12                     | 1.19 $\pm$ 0.08*   |
| <i>Cd48</i>   | 0.90 $\pm$ 0.14                     | 3.81 $\pm$ 0.41*** |
| <i>Cdc20</i>  | 0.44 $\pm$ 0.02***                  | 1.04 $\pm$ 0.05    |
| <i>Cdk2</i>   | 1.43 $\pm$ 0.23                     | 1.81 $\pm$ 0.19    |
| <i>Cdkn1a</i> | 1.15 $\pm$ 0.05*                    | 0.97 $\pm$ 0.02    |
| <i>Cdkn1b</i> | 1.09 $\pm$ 0.08                     | 1.31 $\pm$ 0.06*** |
| <i>Cdkn1c</i> | 0.56 $\pm$ 0.09***                  | 0.40 $\pm$ 0.04*** |
| <i>Cebpa</i>  | 0.63 $\pm$ 0.06***                  | 0.99 $\pm$ 0.10    |
| <i>Csf1r</i>  | 0.40 $\pm$ 0.03***                  | 0.96 $\pm$ 0.06    |
| <i>Csf2ra</i> | 1.76 $\pm$ 0.16***                  | 0.91 $\pm$ 0.06    |
| <i>Csf3r</i>  | 1.61 $\pm$ 0.08***                  | 1.18 $\pm$ 0.07*   |
| <i>Dnmt1</i>  | 0.87 $\pm$ 0.05*                    | 1.91 $\pm$ 0.11*** |
| <i>Dnmt3a</i> | 3.03 $\pm$ 0.35***                  | 1.13 $\pm$ 0.05    |
| <i>Ebfl</i>   | 1.11 $\pm$ 0.15                     | 1.10 $\pm$ 0.12    |
| <i>Egr1</i>   | 0.34 $\pm$ 0.02***                  | 0.44 $\pm$ 0.05*** |
| <i>Epor</i>   | 1.36 $\pm$ 0.21                     | 4.89 $\pm$ 0.32*** |
| <i>Evi1</i>   | 1.22 $\pm$ 0.14                     | 0.71 $\pm$ 0.05*** |
| <i>Ezh1</i>   | 0.73 $\pm$ 0.03***                  | 0.83 $\pm$ 0.03*** |
| <i>Ezh2</i>   | 1.83 $\pm$ 0.14***                  | 2.40 $\pm$ 0.17*** |
| <i>Flt3</i>   | 1.20 $\pm$ 0.09                     | 0.93 $\pm$ 0.05    |
| <i>Fnl</i>    | 73.49 $\pm$ 9.91***                 | 4.84 $\pm$ 0.44*** |
| <i>Fos</i>    | 0.63 $\pm$ 0.03***                  | 0.82 $\pm$ 0.04*** |
| <i>Foxo3</i>  | 0.56 $\pm$ 0.04***                  | 0.88 $\pm$ 0.04**  |
| <i>Fzd2</i>   | 0.34 $\pm$ 0.05***                  | 0.84 $\pm$ 0.06*   |
| <i>Gata1</i>  | 0.69 $\pm$ 0.07***                  | 3.53 $\pm$ 0.25*** |
| <i>Gata2</i>  | 1.23 $\pm$ 0.10*                    | 1.48 $\pm$ 0.06*** |
| <i>Gfi1</i>   | 0.26 $\pm$ 0.04***                  | 0.60 $\pm$ 0.06*** |
| <i>Gfi1b</i>  | 0.34 $\pm$ 0.03***                  | 2.20 $\pm$ 0.11*** |
| <i>Gli1</i>   | 9.16 $\pm$ 1.28***                  | 0.91 $\pm$ 0.14    |

|                 |                   |                |
|-----------------|-------------------|----------------|
| <i>Hes1</i>     | 0.68 ± 0.18*      | 2.11 ± 0.54    |
| <i>Hes5</i>     | 0.39 ± 0.04***    | 0.81 ± 0.09*   |
| <i>Hey1</i>     | 0.32 ± 0.07***    | 0.67 ± 0.06*** |
| <i>Hhip</i>     | 0.19 ± 0.03***    | 1.32 ± 0.16    |
| <i>Hif1a</i>    | 1.93 ± 0.18***    | 1.67 ± 0.10*** |
| <i>Hmga2</i>    | 0.66 ± 0.09**     | 1.02 ± 0.07    |
| <i>Hoxa9</i>    | 1.06 ± 0.12       | 0.71 ± 0.06*** |
| <i>Id1</i>      | 0.27 ± 0.02***    | 0.87 ± 0.06    |
| <i>Ikzf1</i>    | 2.60 ± 0.31***    | 1.30 ± 0.08**  |
| <i>Il1b</i>     | 0.47 ± 0.04***    | 1.15 ± 0.09    |
| <i>Il6</i>      | 0.37 ± 0.02***    | 0.94 ± 0.06    |
| <i>Il6ra</i>    | 1.76 ± 0.15***    | 1.49 ± 0.15**  |
| <i>Il7r</i>     | 0.34 ± 0.02***    | 0.84 ± 0.05*   |
| <i>Irf8</i>     | 1.20 ± 0.15       | 1.34 ± 0.19    |
| <i>Jun</i>      | 0.82 ± 0.06*      | 1.36 ± 0.09**  |
| <i>Lrp5</i>     | 1.26 ± 0.12*      | 0.89 ± 0.03**  |
| <i>Mcl1</i>     | 2.50 ± 0.34***    | 1.02 ± 0.10    |
| <i>Meis1</i>    | 0.96 ± 0.07       | 1.24 ± 0.06**  |
| <i>Mfng</i>     | 0.91 ± 0.06       | 0.84 ± 0.03*** |
| <i>Mki67</i>    | 3.64 ± 0.47***    | 6.51 ± 0.48*** |
| <i>Mpl</i>      | 0.99 ± 0.07       | 0.89 ± 0.03*   |
| <i>Myc</i>      | 1.57 ± 0.15**     | 1.02 ± 0.05    |
| <i>Nfe2l2</i>   | 1.27 ± 0.09*      | 1.11 ± 0.06    |
| <i>Nfkbia</i>   | 7.82 ± 0.64***    | 0.92 ± 0.05    |
| <i>Notch1</i>   | 0.47 ± 0.03***    | 0.90 ± 0.08    |
| <i>Pax5</i>     | 0.90 ± 0.11       | 1.06 ± 0.13    |
| <i>Pdk4</i>     | 0.27 ± 0.01***    | 0.89 ± 0.06    |
| <i>Pmaip1</i>   | 476.89 ± 159.58** | 16.03 ± 5.91*  |
| <i>Ppargc1a</i> | 0.14 ± 0.03***    | 0.49 ± 0.06*** |
| <i>Prkdc</i>    | 1.02 ± 0.07       | 1.84 ± 0.11*** |
| <i>Ptch1</i>    | 0.97 ± 0.06       | 1.02 ± 0.05    |
| <i>Rad51</i>    | 2.09 ± 0.28**     | 3.46 ± 0.41*** |
| <i>Rpal</i>     | 1.65 ± 0.14***    | 1.83 ± 0.13*** |
| <i>Runx1</i>    | 1.28 ± 0.13       | 1.48 ± 0.05*** |
| <i>Spi1</i>     | 6.99 ± 0.63***    | 1.28 ± 0.05*** |
| <i>Slamf1</i>   | 3.75 ± 0.55***    | 1.95 ± 0.11*** |
| <i>Smad7</i>    | 1.35 ± 0.21       | 1.30 ± 0.11    |
| <i>Tcf3</i>     | 1.48 ± 0.07***    | 1.11 ± 0.03*   |
| <i>Tnf</i>      | 1.29 ± 0.07***    | 0.98 ± 0.05    |
| <i>Traf1</i>    | 13.42 ± 1.49***   | 0.84 ± 0.03*** |
| <i>Vwf</i>      | 0.54 ± 0.04***    | 1.58 ± 0.09*** |
| <i>Xiap</i>     | 1.27 ± 0.09*      | 1.29 ± 0.08*   |
| <i>Xrcc5</i>    | 1.54 ± 0.13***    | 1.35 ± 0.10**  |
| <i>Xrcc6</i>    | 0.85 ± 0.03***    | 1.35 ± 0.06*** |
| <i>Zfpml</i>    | 0.58 ± 0.06***    | 1.92 ± 0.09*** |

Fluidigm gene expression analyses of BM HSCs  $\pm$  TNF $\alpha$  (n = 9-24 pools of 100 cells/group from 4 mice in 2 independent experiments). Results are mean  $\pm$  SEM and are expressed as fold changes compared to levels in 0h HSCs. \* $P$  < 0.05, \*\* $P$  < 0.01, \*\*\* $P$  < 0.001.



**Table S3. HSC-specific TNF $\alpha$  signature genes, related to Figure 4**

| <i>Genes</i>         | <b>HSC fold change</b> |                  |                |                                     |
|----------------------|------------------------|------------------|----------------|-------------------------------------|
|                      | <b>vitro 3h</b>        | <b>vitro 12h</b> | <b>vivo 3h</b> | <b>+TNF<math>\alpha</math> mean</b> |
| <i>Cd274</i>         | 3.23                   | 6.98             | 4.55           | 8446                                |
| <i>Pfkfb3</i>        | 3.05                   | 3.27             | 18.56          | 4743                                |
| <i>Serpina3f</i>     | 3.12                   | 14.97            | 64.1           | 4369                                |
| <i>Gbp3</i>          | 3.06                   | 4.15             | 10.8           | 3764                                |
| <i>Cxcl9</i>         | 4.1                    | 267.14           | 119.9          | 3100                                |
| <i>RP23-428M4.4</i>  | 7.74                   | 152.23           | 160.79         | 2919                                |
| <i>Birc3</i>         | 3.84                   | 7.91             | 10.38          | 2874                                |
| <i>Magee2</i>        | 4.45                   | 58.19            | 71.43          | 2456                                |
| <i>Cd69</i>          | 7.31                   | 19.99            | 28.82          | 2370                                |
| <i>Ccl22</i>         | 6.96                   | 92.58            | 8.34           | 2256                                |
| <i>Ccl9</i>          | 3.86                   | 9.99             | 8.45           | 2222                                |
| <i>Gbp5</i>          | 4.65                   | 9.94             | 15.03          | 1861                                |
| <i>Loxl2</i>         | 4.38                   | 41.83            | 13.93          | 1522                                |
| <i>Pdcd1lg2</i>      | 3.67                   | 19.91            | 22.16          | 1139                                |
| <i>Tnfrsf9</i>       | 3.52                   | 29.48            | 105.63         | 1088                                |
| <i>Nfkb2</i>         | 3.85                   | 6.91             | 7.66           | 824                                 |
| <i>RP23-307N14.2</i> | 10.93                  | 53.19            | 48.8           | 801                                 |
| <i>3110043O21Rik</i> | 5.3                    | 5.07             | 3.22           | 709                                 |
| <i>Fcer2a</i>        | 4.29                   | 42.01            | 23.03          | 655                                 |
| <i>Cd82</i>          | 3.81                   | 21.43            | 5.89           | 649                                 |
| <i>4930523C07Rik</i> | 3.82                   | 4.87             | 4.26           | 604                                 |
| <i>Gm26809</i>       | 3.84                   | 13.92            | 28.66          | 565                                 |
| <i>Cd83</i>          | 15.27                  | 27.31            | 28.09          | 440                                 |
| <i>Zbtb46</i>        | 4.99                   | 10.23            | 4.91           | 439                                 |
| <i>Tnfaip8l1</i>     | 4.02                   | 4.45             | 9.03           | 312                                 |
| <i>Cxcl11</i>        | 9.19                   | 40.05            | 169.16         | 278                                 |
| <i>Abtb2</i>         | 4.82                   | 8.96             | 5.13           | 267                                 |
| <i>C77370</i>        | 7.66                   | 16.49            | 334.14         | 259                                 |
| <i>Ffar2</i>         | 3.4                    | 5.81             | 10.18          | 231                                 |
| <i>Nod2</i>          | 20.74                  | 77.47            | 5.05           | 171                                 |
| <i>Serpina3i</i>     | 4.53                   | 22.85            | 371.25         | 160                                 |
| <i>Dpysl5</i>        | 4.9                    | 12.34            | 17.75          | 160                                 |
| <i>Psd</i>           | 3.65                   | 5.88             | 3.67           | 147                                 |
| <i>Tmod2</i>         | 4.68                   | 10.6             | 4.5            | 133                                 |
| <i>Slc39a4</i>       | 4.49                   | 3.58             | 3.5            | 91                                  |
| <i>Slpr3</i>         | 5.12                   | 26.04            | 8.13           | 91                                  |
| <i>Rnd1</i>          | 3.52                   | 4.42             | 19.2           | 83                                  |
| <i>Ackr1</i>         | 6.09                   | 17.83            | 103.95         | 72                                  |
| <i>Madcaml</i>       | 24.73                  | 12.26            | 54.32          | 71                                  |
| <i>Spic</i>          | 4.7                    | 6.25             | 3.53           | 57                                  |
| <i>RP23-211F21.4</i> | 8.29                   | 6.04             | 7.96           | 35                                  |
| <i>Gm15674</i>       | 8.75                   | 4.91             | 6.07           | 27                                  |

|               |      |      |       |    |
|---------------|------|------|-------|----|
| <i>Ptger2</i> | 3.72 | 25.7 | 22.29 | 23 |
| <i>Stab1</i>  | 8.71 | 3.8  | 5.97  | 10 |

Genes commonly upregulated across all three types of TNF $\alpha$  treatment in BM HSCs but not BM GMPs (44 genes, FDR < 0.1, fold change > 3, n = 3). Results are expressed as fold changes compared to levels in respective -TNF $\alpha$  control HSC groups. Genes are ordered by mean normalized read counts of all the +TNF $\alpha$  HSC groups.

**Table S4. GMP-specific TNF $\alpha$  signature genes, related to Figure 4**

| <i>Genes</i>    | <b>GMP fold change</b> |                  |                |                                     |
|-----------------|------------------------|------------------|----------------|-------------------------------------|
|                 | <b>vitro 3h</b>        | <b>vitro 12h</b> | <b>vivo 3h</b> | <b>+TNF<math>\alpha</math> mean</b> |
| <i>Cybb</i>     | 3.47                   | 9.06             | 10.46          | 14996                               |
| <i>Car2</i>     | 7.49                   | 13.32            | 5.82           | 3860                                |
| <i>Il1f9</i>    | 9.04                   | 4.22             | 12.03          | 2980                                |
| <i>Saa3</i>     | 4.47                   | 7.49             | 684.75         | 2527                                |
| <i>Ccl3</i>     | 3.38                   | 6.93             | 4.13           | 2129                                |
| <i>Tnip3</i>    | 5.71                   | 12.58            | 51.22          | 2101                                |
| <i>Nrp2</i>     | 3.53                   | 8.25             | 11.65          | 1772                                |
| <i>Ptx3</i>     | 9.56                   | 23.74            | 190.61         | 1387                                |
| <i>Pde4b</i>    | 4.55                   | 3.38             | 4.5            | 1122                                |
| <i>Sdc4</i>     | 3.21                   | 4.16             | 60.91          | 1090                                |
| <i>Tnf</i>      | 3.97                   | 3.4              | 4.72           | 697                                 |
| <i>Ralgds</i>   | 3.95                   | 5.51             | 11.45          | 498                                 |
| <i>Cx3cr1</i>   | 4.98                   | 10.07            | 5.72           | 493                                 |
| <i>Cp</i>       | 4.13                   | 15.25            | 38.85          | 303                                 |
| <i>Inhba</i>    | 3.67                   | 3.76             | 144.97         | 284                                 |
| <i>Arl5c</i>    | 4.45                   | 4.27             | 10.52          | 264                                 |
| <i>Phlda1</i>   | 3.46                   | 3.86             | 6.02           | 245                                 |
| <i>Pilrb2</i>   | 3.78                   | 3.97             | 7.28           | 196                                 |
| <i>Bcl2a1d</i>  | 3.99                   | 4.08             | 7.46           | 182                                 |
| <i>Fpr2</i>     | 6.14                   | 24.08            | 284.37         | 178                                 |
| <i>Il6</i>      | 3.5                    | 7.18             | 4.21           | 166                                 |
| <i>Lta</i>      | 10.48                  | 10.58            | 13.36          | 163                                 |
| <i>Bcl2a1b</i>  | 5.43                   | 4.05             | 5.11           | 161                                 |
| <i>Pilrb1</i>   | 4.15                   | 3                | 16.21          | 147                                 |
| <i>Ccl4</i>     | 4.45                   | 9.31             | 10.72          | 134                                 |
| <i>Emr4</i>     | 7.39                   | 46.56            | 8.16           | 117                                 |
| <i>Bcl2a1a</i>  | 6.75                   | 4.42             | 11.98          | 116                                 |
| <i>Rasgrp1</i>  | 4.03                   | 3.52             | 14.71          | 113                                 |
| <i>Ankrd33b</i> | 3.8                    | 4.99             | 17.06          | 81                                  |
| <i>Mmp14</i>    | 3.2                    | 30.15            | 39.24          | 79                                  |
| <i>Gem</i>      | 4.22                   | 3.79             | 4.5            | 62                                  |
| <i>Sh2d4a</i>   | 9.04                   | 13.28            | 22.12          | 51                                  |
| <i>Adora2a</i>  | 7.41                   | 4.67             | 3.02           | 17                                  |

Genes commonly upregulated across all three types of TNF $\alpha$  treatment in BM GMPs but not BM HSCs (33 genes, FDR < 0.1, fold change > 3, n = 3). Results are expressed as fold changes compared to levels in respective–TNF $\alpha$  control GMP groups. Genes are ordered by mean normalized read counts of all the +TNF $\alpha$  GMP groups.

**Table S5. Common TNF $\alpha$  signature genes, related to Figure 4**

| <i>Genes</i>   | HSC fold change |           |         | GMP fold change |           |         | +TNF $\alpha$ mean |
|----------------|-----------------|-----------|---------|-----------------|-----------|---------|--------------------|
|                | vitro 3h        | vitro 12h | vivo 3h | vitro 3h        | vitro 12h | vivo 3h |                    |
| <i>Cxcl10</i>  | 4.79            | 79.83     | 155.57  | 4.79            | 15.46     | 23.13   | 8520               |
| <i>Tnfaip3</i> | 5.76            | 9.42      | 10.55   | 6.99            | 6.28      | 3.89    | 2117               |
| <i>Gpr84</i>   | 6.47            | 24.47     | 6.47    | 9.26            | 11.15     | 41.15   | 2064               |
| <i>Nfkbia</i>  | 6.61            | 13.24     | 11.05   | 6.34            | 6.87      | 5.53    | 1733               |
| <i>Prdm1</i>   | 4.29            | 21.2      | 4.97    | 3.26            | 3.44      | 4.16    | 1720               |
| <i>Trafl</i>   | 4.63            | 19.71     | 10.21   | 7.7             | 14.64     | 24.34   | 1259               |
| <i>Irg1</i>    | 21.27           | 36.95     | 30.67   | 3.13            | 51.69     | 187.46  | 1013               |
| <i>Icam1</i>   | 4.92            | 3.93      | 7.13    | 6.29            | 4.46      | 14.61   | 984                |
| <i>Vcam1</i>   | 14.25           | 82.52     | 5.55    | 4.11            | 9.27      | 4.75    | 954                |
| <i>Il1b</i>    | 18.87           | 18.8      | 5.55    | 13.98           | 17.58     | 7.27    | 734                |
| <i>Nfkbie</i>  | 11.5            | 9.48      | 7.33    | 6.88            | 4.86      | 3.34    | 560                |
| <i>Cxcl2</i>   | 6.85            | 12.27     | 125.91  | 14.32           | 6.26      | 4.55    | 514                |
| <i>Atf3</i>    | 4.34            | 35.67     | 11.12   | 3.81            | 8.28      | 4.1     | 473                |
| <i>Il1rn</i>   | 4.2             | 12.63     | 32.17   | 3.16            | 10.41     | 6.04    | 323                |
| <i>Relb</i>    | 7.5             | 16.28     | 18.07   | 4.01            | 7.27      | 45.89   | 263                |
| <i>Fas</i>     | 3.12            | 9.04      | 4.18    | 5.02            | 4.94      | 15.07   | 180                |
| <i>Cxcl16</i>  | 8.4             | 21.24     | 6.47    | 5.85            | 8.45      | 4.1     | 172                |
| <i>Cd40</i>    | 6.46            | 69.66     | 40.37   | 5.67            | 6.6       | 41.82   | 76                 |

Genes commonly upregulated across all three types of TNF $\alpha$  treatment in both BM GMPs and HSCs (18 genes, FDR < 0.1, fold change > 3, n = 3). Results are expressed as fold changes compared to levels in respective –TNF $\alpha$  control HSC and GMP groups. Genes are ordered by mean normalized read counts of all the +TNF $\alpha$  HSC and GMP groups.
